## Standards of Medical Care in Diabetes—2015

- S1 Introduction**
- S3 Professional Practice Committee**
- S4 *Standards of Medical Care in Diabetes—2015: Summary of Revisions***
- S5 1. Strategies for Improving Care**  
Diabetes Care Concepts  
Care Delivery Systems  
When Treatment Goals Are Not Met
- S8 2. Classification and Diagnosis of Diabetes**  
Classification  
Diagnostic Tests for Diabetes  
Categories of Increased Risk for Diabetes (Prediabetes)  
Type 1 Diabetes  
Type 2 Diabetes  
Gestational Diabetes Mellitus  
Monogenic Diabetes Syndromes  
Cystic Fibrosis–Related Diabetes
- S17 3. Initial Evaluation and Diabetes Management Planning**  
Medical Evaluation  
Management Plan  
Common Comorbid Conditions
- S20 4. Foundations of Care: Education, Nutrition, Physical Activity, Smoking Cessation, Psychosocial Care, and Immunization**  
Diabetes Self-management Education and Support  
Medical Nutrition Therapy  
Physical Activity  
Smoking Cessation  
Psychosocial Assessment and Care  
Immunization
- S31 5. Prevention or Delay of Type 2 Diabetes**  
Lifestyle Modifications  
Pharmacological Interventions  
Diabetes Self-management Education and Support
- S33 6. Glycemic Targets**  
Assessment of Glycemic Control  
A1C Goals  
Hypoglycemia  
Intercurrent Illness
- S41 7. Approaches to Glycemic Treatment**  
Pharmacological Therapy for Type 1 Diabetes  
Pharmacological Therapy for Type 2 Diabetes  
Bariatric Surgery
- S49 8. Cardiovascular Disease and Risk Management**  
Hypertension/Blood Pressure Control  
Dyslipidemia/Lipid Management  
Antiplatelet Agents  
Coronary Heart Disease
- S58 9. Microvascular Complications and Foot Care**  
Nephropathy  
Retinopathy  
Neuropathy  
Foot Care
- S67 10. Older Adults**  
Treatment Goals  
Hypoglycemia  
Pharmacological Therapy
- S70 11. Children and Adolescents**  
Type 1 Diabetes  
Type 2 Diabetes  
Psychosocial Issues
- S77 12. Management of Diabetes in Pregnancy**  
Diabetes in Pregnancy  
Preconception Counseling  
Glycemic Targets in Pregnancy  
Pregnancy and Antihypertensive Drugs  
Management of Gestational Diabetes Mellitus  
Management of Pregestational Type 1 Diabetes and Type 2 Diabetes in Pregnancy  
Postpartum Care
- S80 13. Diabetes Care in the Hospital, Nursing Home, and Skilled Nursing Facility**  
Hyperglycemia in the Hospital  
Glycemic Targets in Hospitalized Patients  
Antihyperglycemic Agents in Hospitalized Patients  
Preventing Hypoglycemia  
Diabetes Care Providers in the Hospital  
Self-management in the Hospital  
Medical Nutrition Therapy in the Hospital  
Bedside Blood Glucose Monitoring  
Discharge Planning  
Diabetes Self-management Education
- S86 14. Diabetes Advocacy**  
Advocacy Position Statements
- S88 Professional Practice Committee for the *Standards of Medical Care in Diabetes—2015***
- S90 Index**

This issue is freely accessible online at [care.diabetesjournals.org](http://care.diabetesjournals.org).

Keep up with the latest information for *Diabetes Care* and other ADA titles via Facebook ([/ADAJournals](https://www.facebook.com/ADAJournals)) and Twitter ([@ADA\\_Journals](https://twitter.com/ADA_Journals)).
